# Supplementary material for: Response Trajectories and Temporal Trends of Viloxazine Treatment for Young People With ADHD: A Meta-Analysis
Source: PubMed Central journal article supplement (PMC11577144; doi:10.1001/jamanetworkopen.2024.45885), 2024-11-19

## Supplemental Online Content

Yu C, Kao Y, Thompson T, et al. Response trajectories and temporal trends of viloxazine treatment for young people with ADHD: a meta-analysis. *JAMA Netw Open*. 2024;7(11):e2445885. doi:10.1001/jamanetworkopen.2024.45885

**eFigure 1.** Study Flowchart

**eAppendix 1.** Search Strategy

**eAppendix 2.** Reasons for Exclusion

**eFigure 2.** Risk of Bias Plot of the Included Studies

**eTable 1.** Model Fitting for the Dose-Response Association Between the Dose of Viloxazine and the Outcome

**eTable 2.** Model Fitting for the Dose-Response (mg/kg) Association Between the Dose of Viloxazine and the Outcome

**eFigure 3.** Pairwise Meta-Analysis for Risk Ratio of Nausea

**eFigure 4.** Pairwise Meta-Analysis for Risk Ratio of Headache

**eFigure 5.** Pairwise Meta-Analysis for Risk Ratio of Somnolence

**eFigure 6.** Pairwise Meta-Analysis for Risk Ratio of Poor Appetite

**eFigure 7.** Pairwise Meta-Analysis for Risk Ratio of Fatigue

**eFigure 8.** Pairwise Meta-Analysis for Risk Ratio of Abdominal Pain

**eTable 3.** Raw Incidence of Adverse Effects

**eFigure 9.** Pairwise Meta-Analysis for Risk Ratio of Dropout Due to Adverse Events and All-Cause Discontinuation

**eFigure 10.** Dose Response Meta-Analysis for Risk Ratio of All-Cause Discontinuation

**eFigure 11.** Dose Response Meta-Analysis for Risk Ratio of Dropout Due to Adverse Events

**eFigure 12.** Dose Response Meta-Analysis for Risk Ratio of Abdominal Pain

**eFigure 13.** Dose Response Meta-Analysis for Risk Ratio of Fatigue

**eFigure 14.** Dose Response Meta-Analysis for Risk Ratio of Headache

**eFigure 15.** Dose Response Meta-Analysis for Risk Ratio of Poor Appetite

**eFigure 16.** Dose Response Meta-Analysis for Risk Ratio of Nausea

**eFigure 17.** Dose Response Meta-Analysis for Risk Ratio of Somnolence

This supplemental material has been provided by the authors to give readers additional information about their work.

**eFigure 1. Study Flowchart**

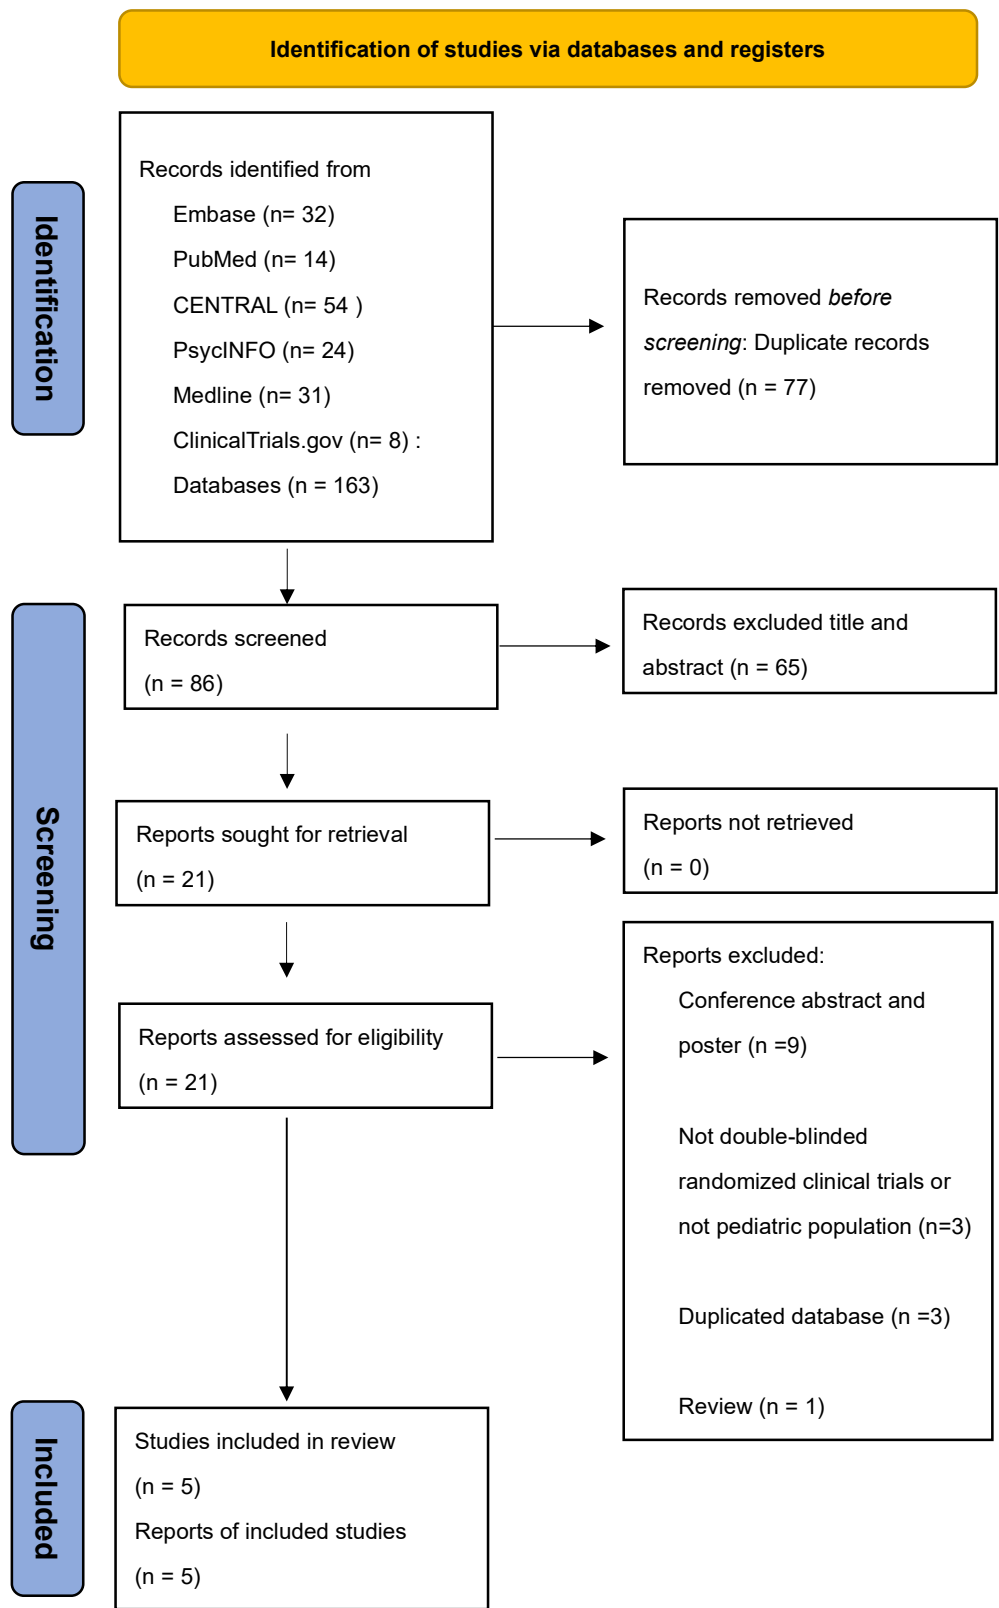

From: Page MJ, McKenzie JE, Bossuyt PM, Boutron I, Hoffmann TC, Mulrow CD, et al. The PRISMA 2020 statement: an updated guideline for reporting systematic reviews. *BMJ* 2021;372:n71. doi: 10.1136/bmj.n71  
© 2024 Yu C et al. *JAMA Network Open*.

## eAppendix 1. Search Strategy

| Database                                                                 |                                                                                                                                                                                                                                                                             |
|--------------------------------------------------------------------------|-----------------------------------------------------------------------------------------------------------------------------------------------------------------------------------------------------------------------------------------------------------------------------|
| PubMed search strategy                                                   |                                                                                                                                                                                                                                                                             |
| #1                                                                       | "viloxazin"[All Fields] OR "viloxazine"[MeSH Terms] OR "viloxazine"[All Fields] (408)                                                                                                                                                                                       |
| #2                                                                       | "attention deficit disorder with hyperactivity"[MeSH Terms] OR ("attention"[All Fields] AND "deficit"[All Fields] AND "disorder"[All Fields] AND "hyperactivity"[All Fields]) OR "attention deficit disorder with hyperactivity"[All Fields] OR "adhd"[All Fields] (51,100) |
| #3                                                                       | #1 AND #2 (68)                                                                                                                                                                                                                                                              |
| #4                                                                       | #3 AND (randomizedcontrolledtrial[Filter]) (14)                                                                                                                                                                                                                             |
| Cochrane Central Register of Controlled Trials (CENTRAL) search strategy |                                                                                                                                                                                                                                                                             |
| #1                                                                       | MeSH descriptor: [Viloxazine] explode all trees (69)                                                                                                                                                                                                                        |
| #2                                                                       | (viloxazine):ti,ab,kw (Word variations have been searched) (158)                                                                                                                                                                                                            |
| #3                                                                       | MeSH descriptor: [Attention Deficit Disorder with Hyperactivity] explode all trees (3,836)                                                                                                                                                                                  |
| #4                                                                       | ADHD (6,146)                                                                                                                                                                                                                                                                |
| #5                                                                       | ("Attention Deficit Disorder with Hyperactivity"):ti,ab,kw (3,868)                                                                                                                                                                                                          |
| #6                                                                       | #1 OR #2 (158)                                                                                                                                                                                                                                                              |
| #7                                                                       | #3 OR #4 OR #5 (6,890)                                                                                                                                                                                                                                                      |
| #8                                                                       | #6 AND #7 (54)                                                                                                                                                                                                                                                              |
| Embase search strategy                                                   |                                                                                                                                                                                                                                                                             |
| #1.                                                                      | 'viloxazine'/exp OR viloxazine (1,646)                                                                                                                                                                                                                                      |
| #2.                                                                      | 'attention deficit hyperactivity disorder'/exp OR 'attention deficit hyperactivity disorder' OR 'adhd'/exp OR adhd (89,423)                                                                                                                                                 |
| #3.                                                                      | #1 AND #2 (147)                                                                                                                                                                                                                                                             |
| #4.                                                                      | #3 AND 'randomized controlled trial'/de (32)                                                                                                                                                                                                                                |
| PsycInfo search strategy                                                 |                                                                                                                                                                                                                                                                             |
| S1                                                                       | Viloxazine AND ( (attention deficit disorder with hyperactivity or adhd) ) (24)                                                                                                                                                                                             |
| Medline search strategy                                                  |                                                                                                                                                                                                                                                                             |
| 1                                                                        | Viloxazine/ or Viloxazine.mp. (395)                                                                                                                                                                                                                                         |
| 2                                                                        | Attention Deficit Disorder with Hyperactivity/ or Attention Deficit Disorder with Hyperactivity.mp. or ADHD.mp. (44,956)                                                                                                                                                    |
| 3                                                                        | randomized controlled trial.pt. (613,775)                                                                                                                                                                                                                                   |
| 4                                                                        | controlled clinical trial.pt. (95,538)                                                                                                                                                                                                                                      |
| 5                                                                        | randomized.ab. (638,049)                                                                                                                                                                                                                                                    |
| 6                                                                        | placebo.ab. (246,320)                                                                                                                                                                                                                                                       |
| 7                                                                        | clinical trials as topic.sh. (202,458)                                                                                                                                                                                                                                      |

8 randomly.ab. (429,890)

9 trial.ti. (305,586)

10 3 or 4 or 5 or 6 or 7 or 8 or 9 (1,586,859)

11 exp animals/ not humans.sh. (5,225,418)

12 10 not 11 (1,460,560)

13 1 and 2 and 12 (31)

**ClinicalTrials.gov (<https://clinicaltrials.gov/>)**

Attention Deficit Disorder With Hyperactivity | Viloxazine (8)

CENTRAL: Cochrane Central Register of Controlled Trials

## **eAppendix 2.** Reasons for Exclusion

### **Not DBRCT, not pediatric population (n=3)**

1. A Phase IV, Open-Label, Flexible-Dose Safety Trial Evaluating SPN-812 Administered With Psychostimulants in Children and Adolescents (6 to 17 Years of Age) With Attention-Deficit/Hyperactivity Disorder (ADHD) [Internet]. 2021. Available from: <https://clinicaltrials.gov/study/NCT04786990>.
2. Nasser A, Hull JT, Chaturvedi SA, Liranso T, Odebo O, Kosheleff AR, et al. A Phase III, Randomized, Double-Blind, Placebo-Controlled Trial Assessing the Efficacy and Safety of Viloxazine Extended-Release Capsules in Adults with Attention-Deficit/Hyperactivity Disorder. *CNS drugs*. 2022;36(8):897-915.
3. Nct. Evaluation of SPN-812 (Viloxazine Extended-release Capsule) in Adults With ADHD. <https://clinicaltrials.gov/show/NCT04016779>. 2019.

### **Duplicated data (n=3)**

1. Nasser A, Hull JT, Chowdhry FA, Adewole T, Liranso T, Marcus R. Phase 3, randomized, double-blind, placebo-controlled studies evaluating efficacy and safety of extended-release viloxazine (SPN-812) for pediatric ADHD: update on the second adolescent study (p304). *Neurotherapeutics*. 2019;16(3):915.
2. Nct. Efficacy and Safety of SPN-812 (Viloxazine Extended-release Capsule) in Children With ADHD. <https://clinicaltrials.gov/show/NCT02633527>. 2015.
3. Nasser A, Hull JT, Liranso T, Busse GD, Melyan Z, Childress AC, et al. The effect of viloxazine extended-release capsules on functional impairments associated with attention-deficit/hyperactivity disorder (ADHD) in children and adolescents in four phase 3 placebo-controlled trials. *Neuropsychiatric disease and treatment*. 2021;17:1751-62.

### **Conference abstract or Poster (n=9)**

1. Findling RL, Newcorn JH, Cutler AJ, Childress AC, Hull JT, Qin P, et al. 5.13 Evaluation of the Efficacy of Viloxazine ER in ADHD Inattentive and Combined Presentations. *Journal of the American Academy of Child and Adolescent Psychiatry*. 2023;62(10):S262-S3.
2. Johnson JK, Saylor K, Brittain ST, Tulloch G, Liranso T. A double-blind, placebo-controlled, dose-ranging study of extended-release viloxazine (SPN-812 ER) in children with attention-deficit/hyperactivity disorder (ADHD). *Journal of the American Academy of Child and Adolescent Psychiatry*. 2017;56(10):S283-S4.
3. Nasser A, Busse GD, Hull J, Chowdhry F, Adewole T, Liranso T, et al. 1.70 A PHASE 3, RANDOMIZED, DOUBLE-BLIND, PLACEBO-CONTROLLED STUDY (P301) ASSESSING THE EFFICACY AND SAFETY OF SPN-812 (EXTENDED-RELEASE VILOXAZINE) 100 AND 200MG FOR THE TREATMENT OF ADHD IN CHILDREN. *Journal of the American Academy of Child and Adolescent Psychiatry*. 2019;58(10):S169-S70.
4. Nasser A, Hull JT, Chaturvedi S, Adewole T, Liranso T, Busse G, et al. 5.31 THE EFFICACY AND SAFETY OF SPN-812 (VILOXAZINE EXTENDED-RELEASE) FOR THE TREATMENT OF ADHD IN CHILDREN AND ADOLESCENTS. *Journal of the American Academy of Child and Adolescent Psychiatry*. 2020;59(10):S159.
5. Nasser A, Hull JT, Chowdhry FA, Adewole T, Liranso T, Marcus R. Extended-release viloxazine (SPN-812) for the treatment of attention-deficit/hyperactivity disorder (ADHD) in adolescents: topline results of a phase 3, randomized, double-blind, placebo-controlled study (p302). *Neurotherapeutics*. 2019;16(3):914-5.

6. Nasser A, Hull JT, Chowdhry FA, Adewole T, Liranso T, Schwabe S. 112 A Phase 3, Randomized, Double-Blind, Placebo-Controlled Study (P302): efficacy and Safety of Extended-Release Viloxazine in Adolescents with ADHD. *CNS spectrums*. 2020;25(2):272-3.
7. Nasser A, Hull JT, Chowdhry FA, Adewole T, Liranso T, Schwabe S. 113 Phase 3, Randomized, Double-Blind, Placebo-Controlled Study (P303) Assessing Efficacy and Safety of Extended-Release Viloxazine in Children with ADHD. *CNS spectrums*. 2020;25(2):273-4.
8. Nasser A, Johnson JK, Adewole T, Liranso T, Marcus R. Phase 3 randomized, double-blind, placebo-controlled studies evaluating efficacy and safety of extended-release viloxazine for pediatric ADHD. *CNS spectrums*. 2019;24(1):177-8.
9. Nasser A, Kosheleff AR, Hull JT, Liranso T, Qin P, Busse GD, et al. Evaluating the likelihood to be helped or harmed after treatment with viloxazine extended-release in children and adolescents with attention-deficit/hyperactivity disorder. *International Journal of Clinical Practice*. 2021;75(8).

#### **Review (n=1)**

1. Raible H, D'Souza MS. Extended-Release Viloxazine for the Treatment of Attention-Deficit Hyperactivity Disorder in School-Age Children and Adolescents. *Annals of pharmacotherapy*. 2023;57(12):1436-48.

**eFigure 2.** Risk of Bias Plot of the Included Studies

|       |              | Risk of bias domains |    |    |    |    |         |
|-------|--------------|----------------------|----|----|----|----|---------|
|       |              | D1                   | D2 | D3 | D4 | D5 | Overall |
| Study | Johnson 2020 |                      |    |    |    |    |         |
|       | Nasser 2020  |                      |    |    |    |    |         |
|       | Nasser 2021a |                      |    |    |    |    |         |
|       | Nasser 2021b |                      |    |    |    |    |         |
|       | Nasser 2021c |                      |    |    |    |    |         |

Domains:  
 D1: Bias arising from the randomization process.  
 D2: Bias due to deviations from intended intervention.  
 D3: Bias due to missing outcome data.  
 D4: Bias in measurement of the outcome.  
 D5: Bias in selection of the reported result.

Judgement  
 Some concerns  
 Low



**eTable 1.** Model Fitting for the Dose-Response Association Between the Dose of Viloxazine and the Outcome

| Outcome                          | Dose-response association | Best model fitting (linear vs quadratic vs spline) <sup>a</sup> | R <sup>2</sup> (Goodness-of-fit) |
|----------------------------------|---------------------------|-----------------------------------------------------------------|----------------------------------|
| All ADHD symptoms*               | p<0.001                   | Spline, p<0.001                                                 | 0.948                            |
| Inattention symptoms*            | p<0.001                   | Spline, p<0.001                                                 | 0.924                            |
| Hyperactivity symptoms*          | p<0.001                   | Spline, p<0.001                                                 | 0.923                            |
| Response rate*                   | p<0.001                   | Spline, p<0.001                                                 | 0.923                            |
| Response trajectory of 100 mg/d* | p<0.001                   | Spline, p<0.001                                                 | 0.978                            |
| Response trajectory of 200 mg/d* | p<0.001                   | Spline, p<0.001                                                 | 0.945                            |
| Response trajectory of 400 mg/d* | p<0.001                   | Spline, p<0.001                                                 | 0.927                            |
| Dropout                          | p=0.05                    | Linear, p=0.05                                                  | 0.194                            |
| Dropout due to adverse effect    | p=0.182                   | Linear, p=0.18                                                  | 0.156                            |
| Nausea*                          | p<0.001                   | Spline, p=0.01                                                  | 0.642                            |
| Headache*                        | p=0.040                   | Linear, p=0.04                                                  | 0.269                            |
| Somnolence*                      | p=0.029                   | Spline, p=0.03                                                  | 0.709                            |
| Poor appetite*                   | p=0.037                   | Linear, p=0.04                                                  | 0.662                            |
| Abdominal pain                   | p=0.916                   | Linear, p=0.92                                                  | 0.110                            |
| Fatigue                          | p=0.050                   | Linear, p=0.05                                                  | 0.585                            |

<sup>a</sup> spline is restricted cubic spline with three knots (0.1, 0.5, 0.9)

\*: statistically significant dose-response association between the dose of viloxazine and the outcome

Abbreviations: ADHD=attention deficit/hyperactivity

**eTable 2.** Model Fitting for the Dose-Response (mg/kg) Association Between the Dose of Viloxazine and the Outcome

| Outcome                 | Dose-response association | Best model fitting (linear vs quadratic vs spline) <sup>a</sup> | R <sup>2</sup> (Goodness-of-fit) |
|-------------------------|---------------------------|-----------------------------------------------------------------|----------------------------------|
| All ADHD symptoms*      | p<0.001                   | Spline, p<0.001                                                 | 0.930                            |
| Inattention symptoms*   | p<0.001                   | Spline, p<0.001                                                 | 0.901                            |
| Hyperactivity symptoms* | p<0.001                   | Spline, p<0.001                                                 | 0.893                            |
| Response rate*          | p<0.001                   | Spline, p=0.004                                                 | 0.846                            |

<sup>a</sup> spline is restricted cubic spline with three knots (0.1, 0.5, 0.9)

\*: statistically significant dose-response association between the dose of viloxazine and the outcome

Abbreviations: ADHD=attention deficit/hyperactivity

**eFigure 3.** Pairwise Meta-Analysis for Risk Ratio of Nausea

Nausea ( $I^2=5.8\%$ )

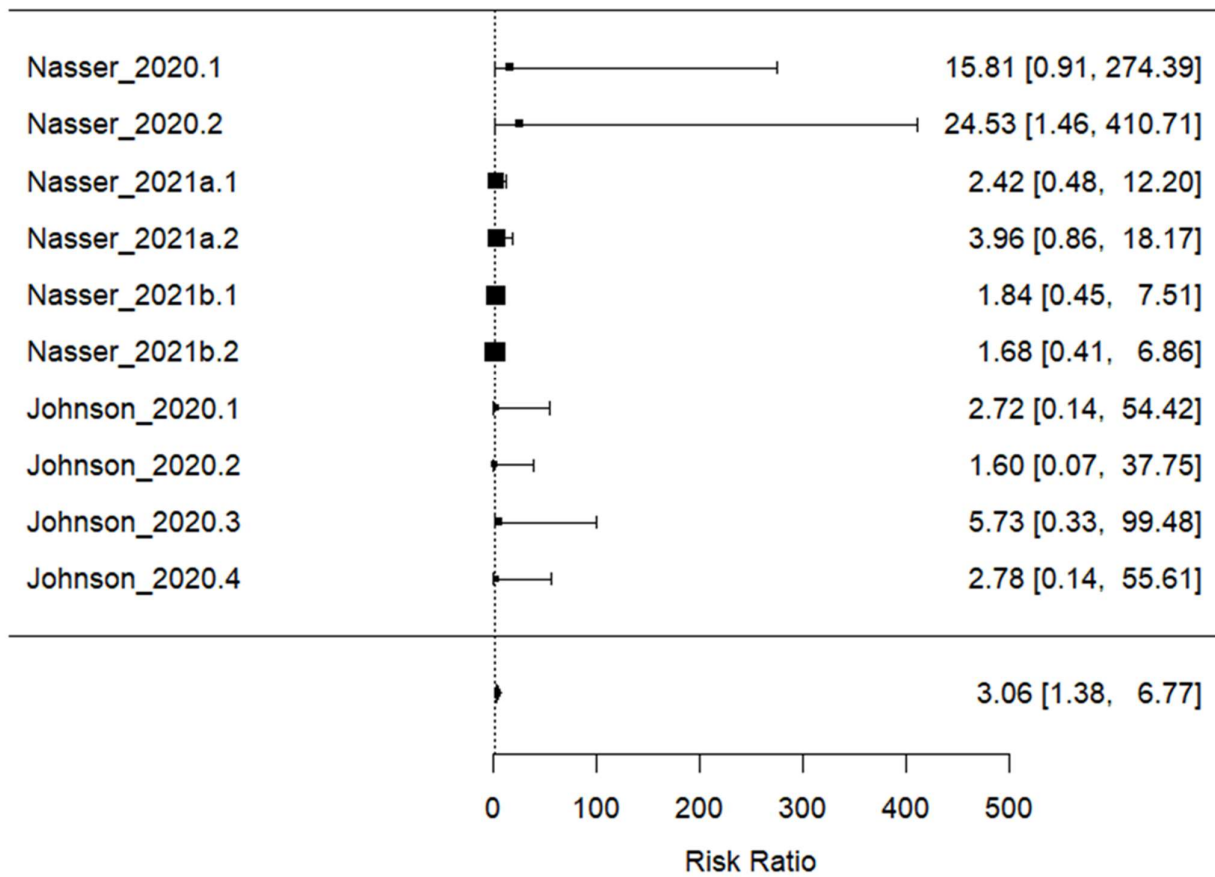

**eFigure 4.** Pairwise Meta-Analysis for Risk Ratio of Headache

Headache ( $I^2=35.81\%$ )

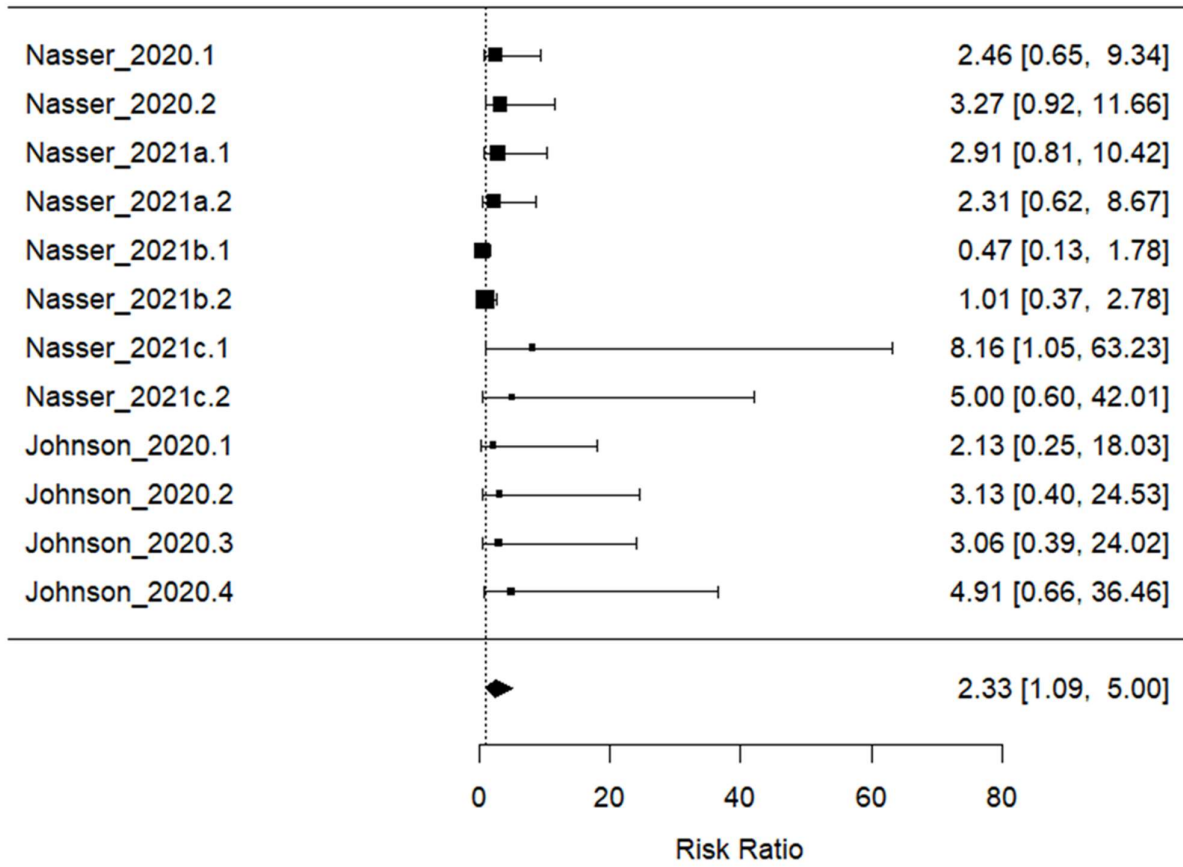

**eFigure 5.** Pairwise Meta-Analysis for Risk Ratio of Somnolence

Somnolence ( $I^2=26.91\%$ )

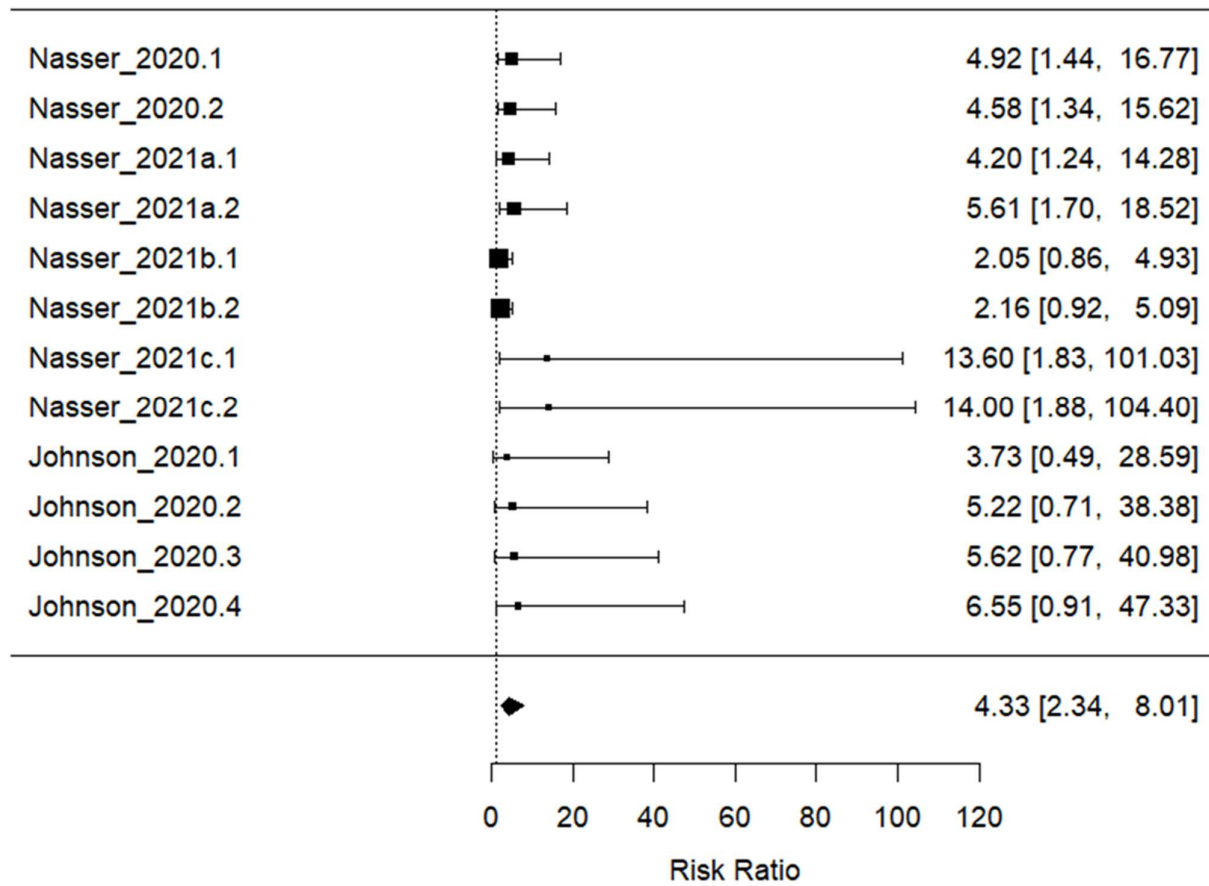

**eFigure 6.** Pairwise Meta-Analysis for Risk Ratio of Poor Appetite

Poor appetite ( $I^2=26.49\%$ )

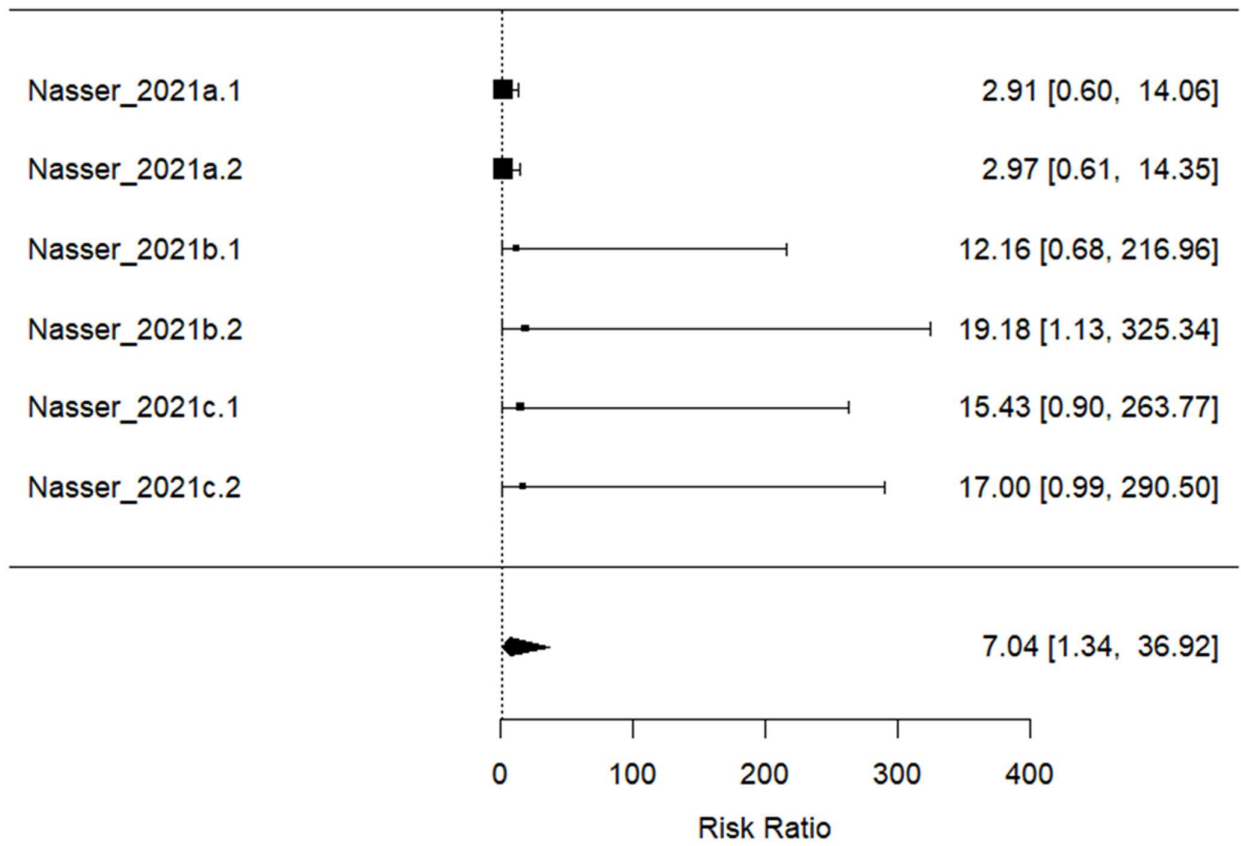

**eFigure 7.** Pairwise Meta-Analysis for Risk Ratio of Fatigue

Fatigue ( $I^2=9.64\%$ )

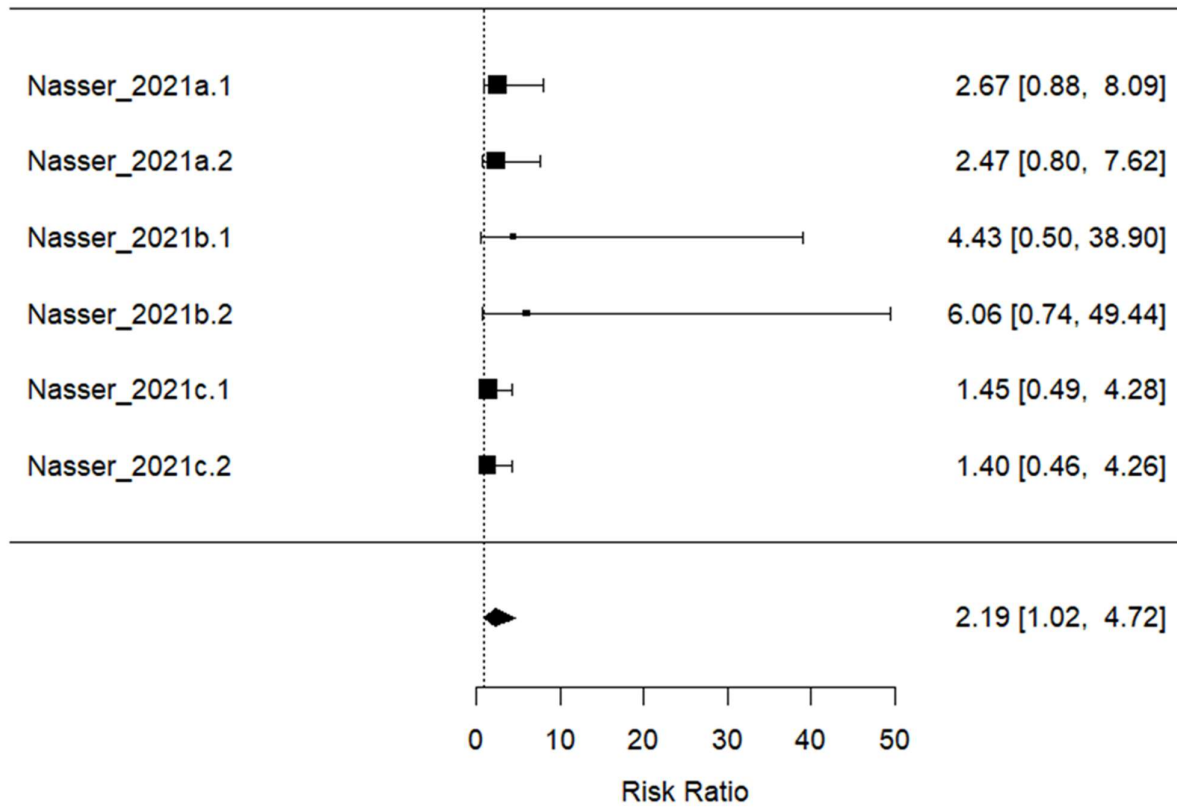

**eFigure 8.** Pairwise Meta-Analysis for Risk Ratio of Abdominal Pain

Abdominal pain ( $I^2=0\%$ )

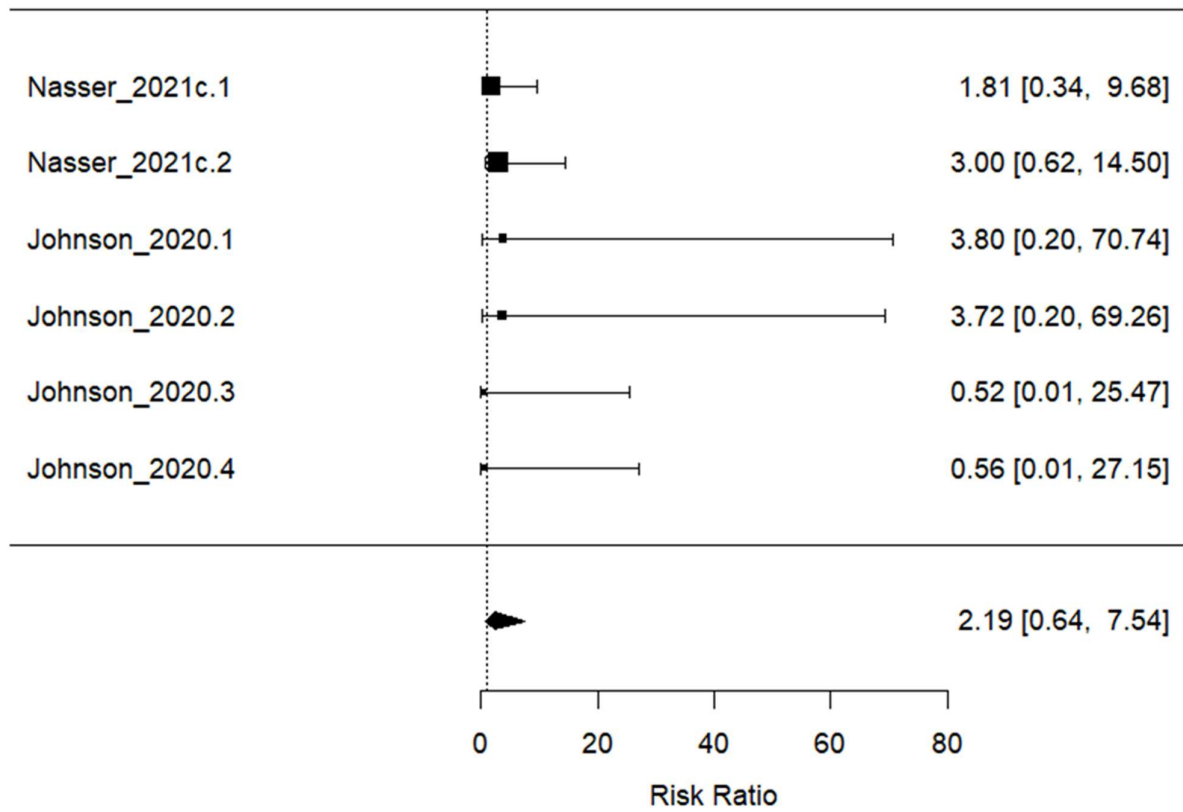



**eTable 3. Raw Incidence of Adverse Effects**

| Study        | Intervention arms | sample size | Drop out | Drop out due to AE | Decreased appetite | Abdominal pain | Nausea | Headache | Somnolence | Fatigue |
|--------------|-------------------|-------------|----------|--------------------|--------------------|----------------|--------|----------|------------|---------|
| Nasser 2020  | Viloxazine 100mg  | 147         | 31       | 5                  |                    |                | 7      | 7        | 14         |         |
|              | Viloxazine 200mg  | 158         | 20       | 2                  |                    |                | 12     | 10       | 14         |         |
|              | Placebo           | 155         | 27       | 2                  |                    |                | 0      | 3        | 3          |         |
| Nasser 2021a | Viloxazine 400mg  | 99          | 12       | 4                  | 6                  |                | 5      | 9        | 13         | 11      |
|              | Viloxazine 600mg  | 97          | 18       | 5                  | 6                  |                | 8      | 7        | 17         | 10      |
|              | Placebo           | 96          | 12       | 1                  | 2                  |                | 2      | 3        | 3          | 4       |
| Nasser 2021b | Viloxazine 200mg  | 94          | 20       | 4                  | 5                  |                | 5      | 3        | 13         | 4       |
|              | Viloxazine 400mg  | 103         | 14       | 2                  | 9                  |                | 5      | 7        | 15         | 6       |
|              | Placebo           | 104         | 8        | 0                  | 0                  |                | 3      | 7        | 7          | 1       |
| Nasser 2021c | Viloxazine 200mg  | 107         | 19       | 6                  | 8                  | 4              |        | 9        | 15         | 8       |
|              | Viloxazine 400mg  | 97          | 23       | 4                  | 8                  | 6              |        | 5        | 14         | 7       |
|              | Placebo           | 97          | 17       | 3                  | 0                  | 2              |        | 1        | 1          | 5       |
| Johnson 2020 | Viloxazine 100mg  | 45          | 11       | 4                  |                    | 3              | 2      | 4        | 7          | 2       |
|              | Viloxazine 200mg  | 46          | 17       | 3                  |                    | 3              | 1      | 6        | 10         | 2       |
|              | Viloxazine 300mg  | 47          | 14       | 1                  |                    | 0              | 5      | 6        | 11         | 1       |
|              | Viloxazine 400mg  | 44          | 17       | 5                  |                    | 0              | 2      | 9        | 12         | 5       |
|              | Placebo           | 24          | 3        | 0                  |                    | 0              | 0      | 1        | 1          | 0       |

**eFigure 9.** Pairwise Meta-Analysis for Risk Ratio of Dropout Due to Adverse Events and All-Cause Discontinuation

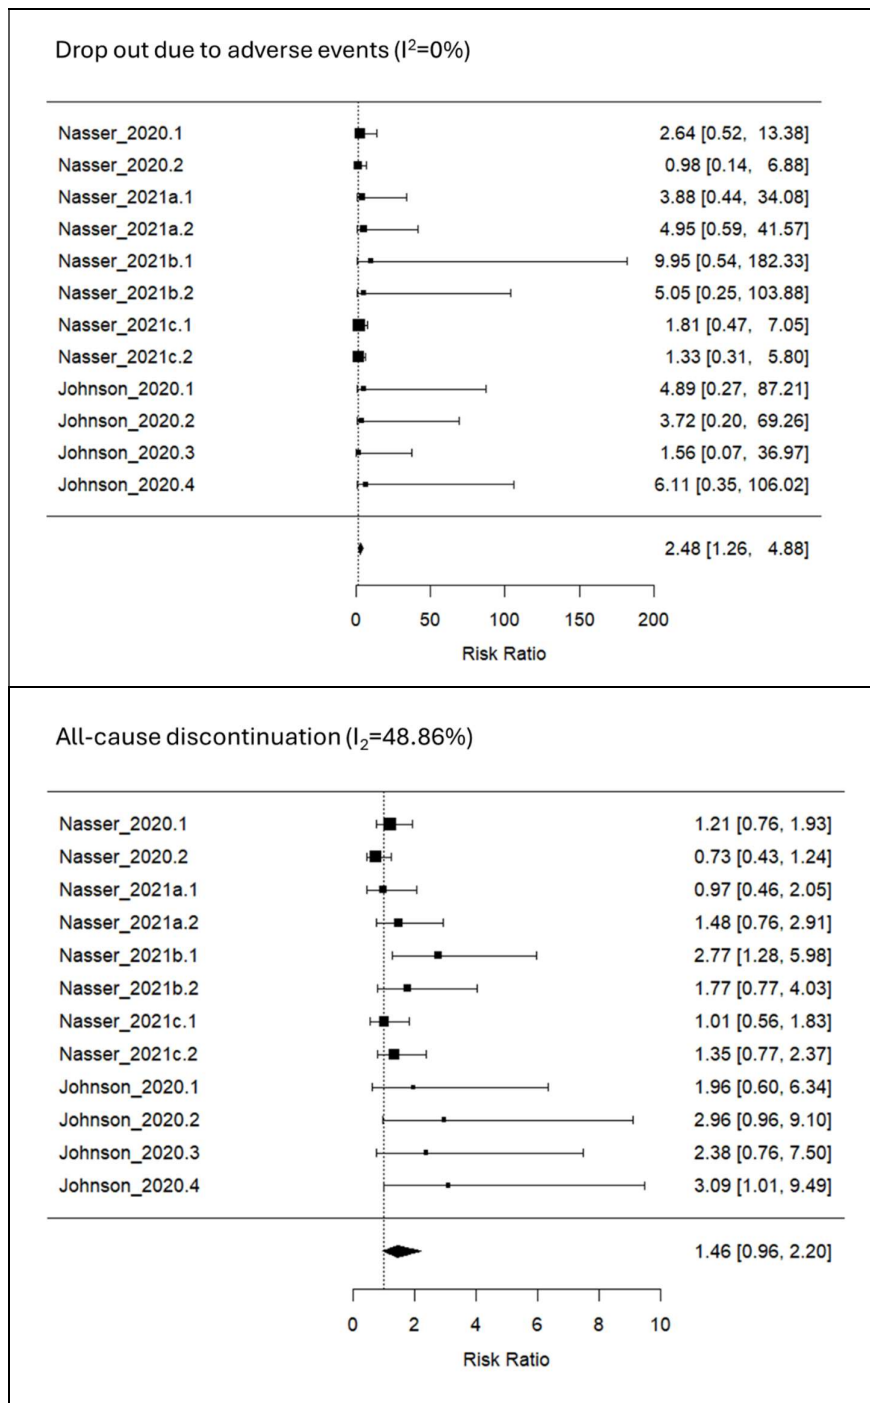

Nasser\_2020.1/2 = 100/200mg; Nasser\_2021a.1/2 = 400/600mg; Nasser\_2021b.1/2 = 200/400mg; Nasser\_2021c.1/2 = 200/400mg; Johnson\_2020.1/2/3/4 = 100/200/300/400mg.

**eFigure 10.** Dose Response Meta-Analysis for Risk Ratio of All-Cause Discontinuation

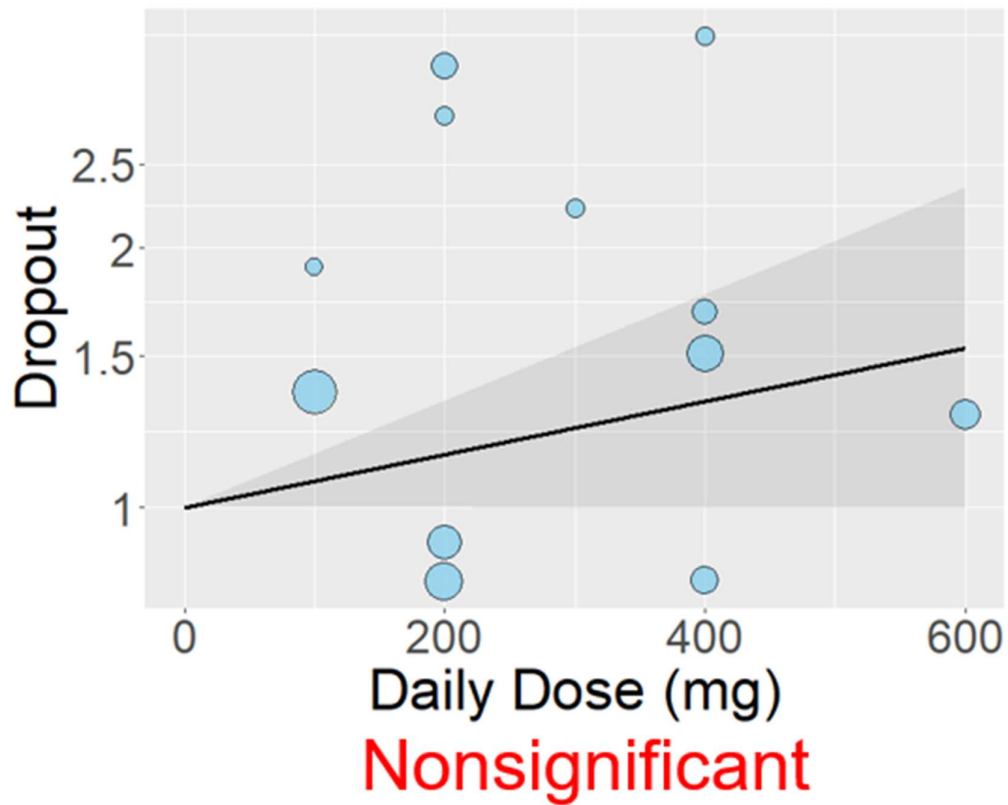

eFigure 11. Dose Response Meta-Analysis for Risk Ratio of Dropout Due to Adverse Events

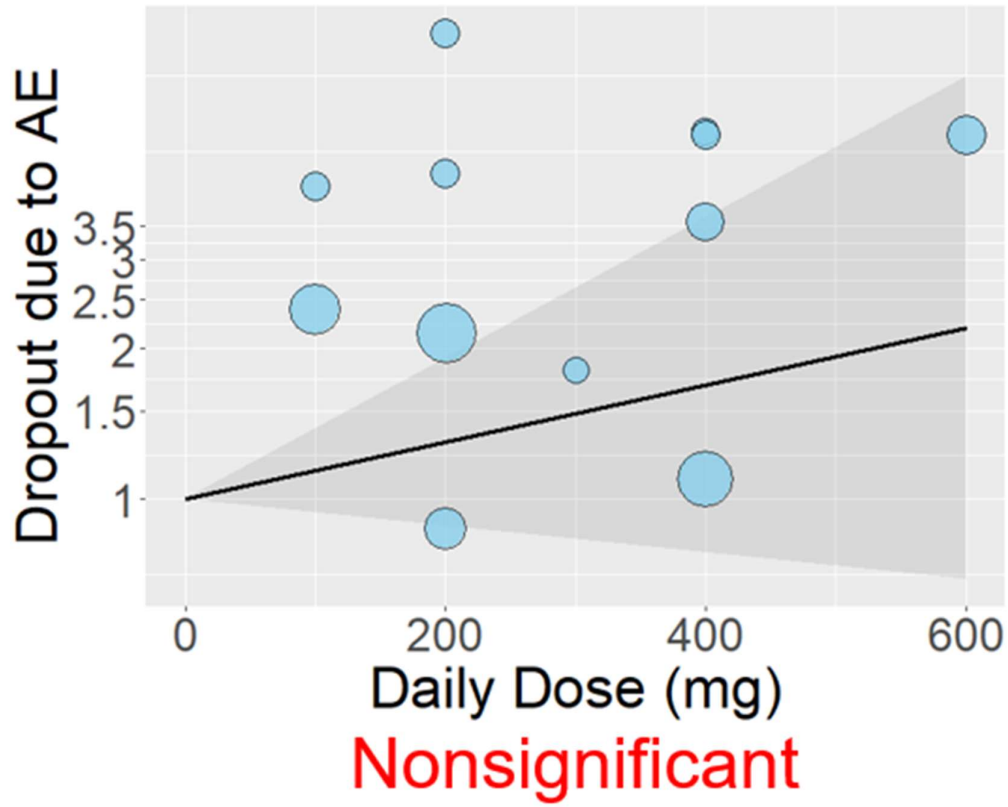

eFigure 12. Dose Response Meta-Analysis for Risk Ratio of Abdominal Pain

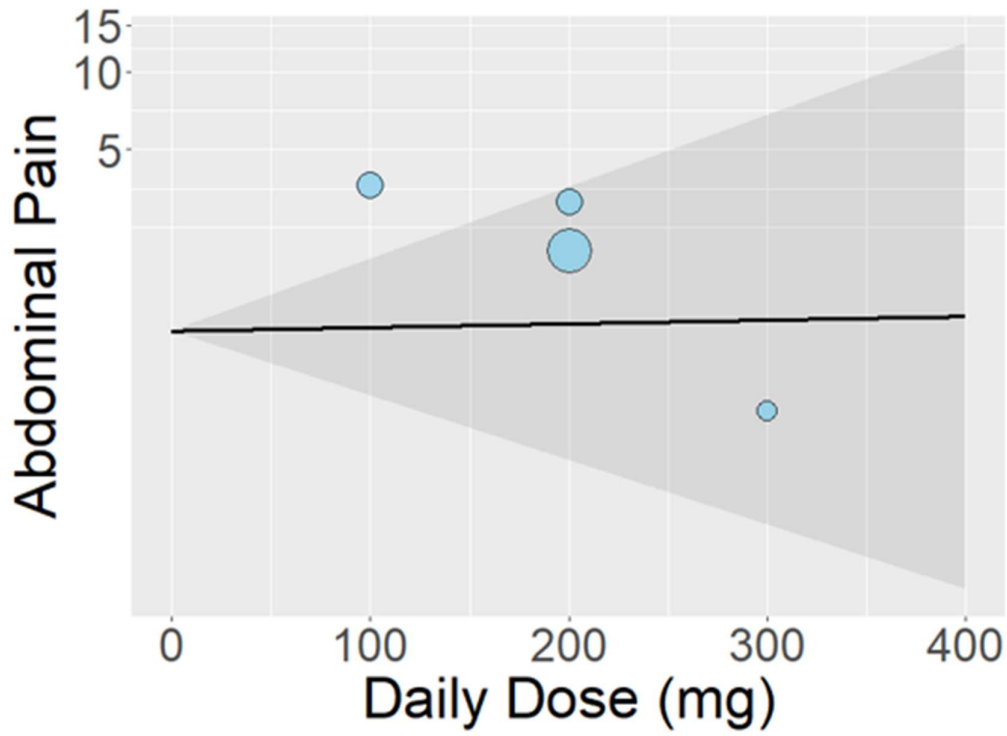

**Nonsignificant**

eFigure 13. Dose Response Meta-Analysis for Risk Ratio of Fatigue

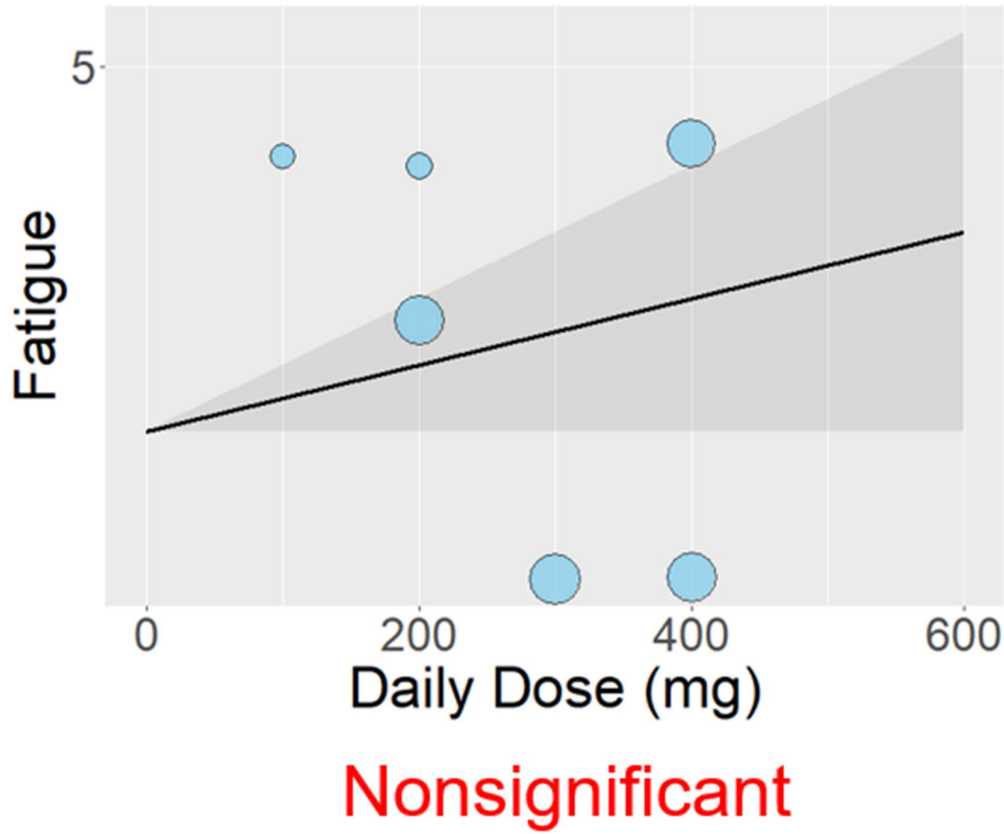

eFigure 14. Dose Response Meta-Analysis for Risk Ratio of Headache

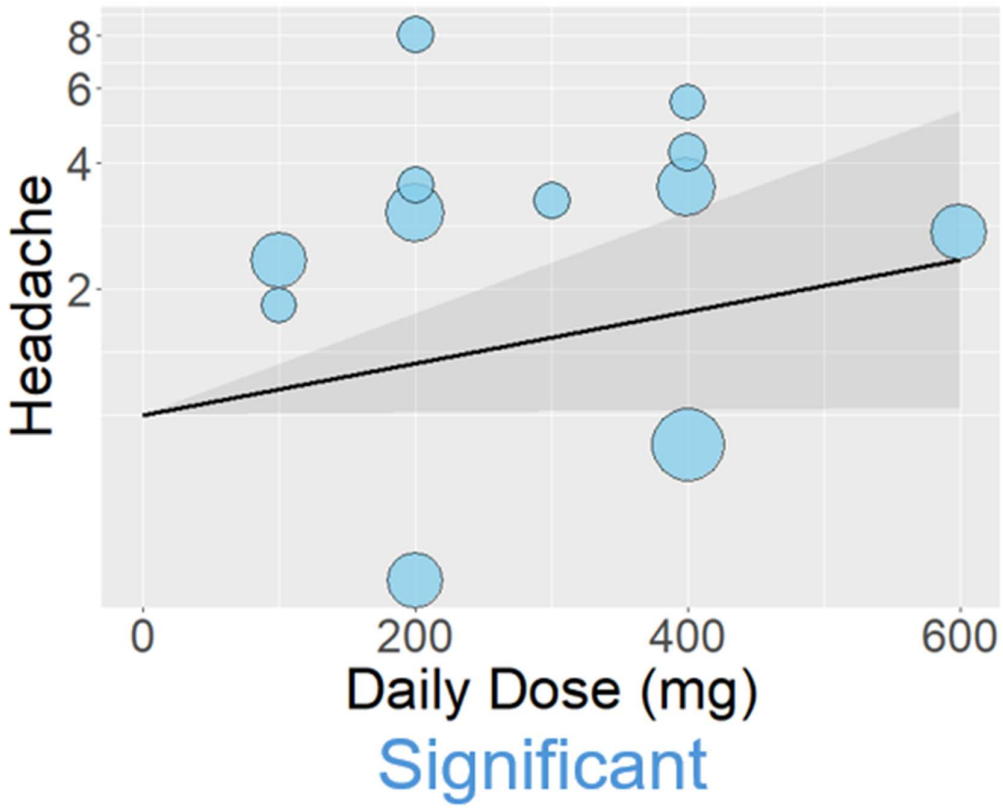

**eFigure 15.** Dose Response Meta-Analysis for Risk Ratio of Poor Appetite

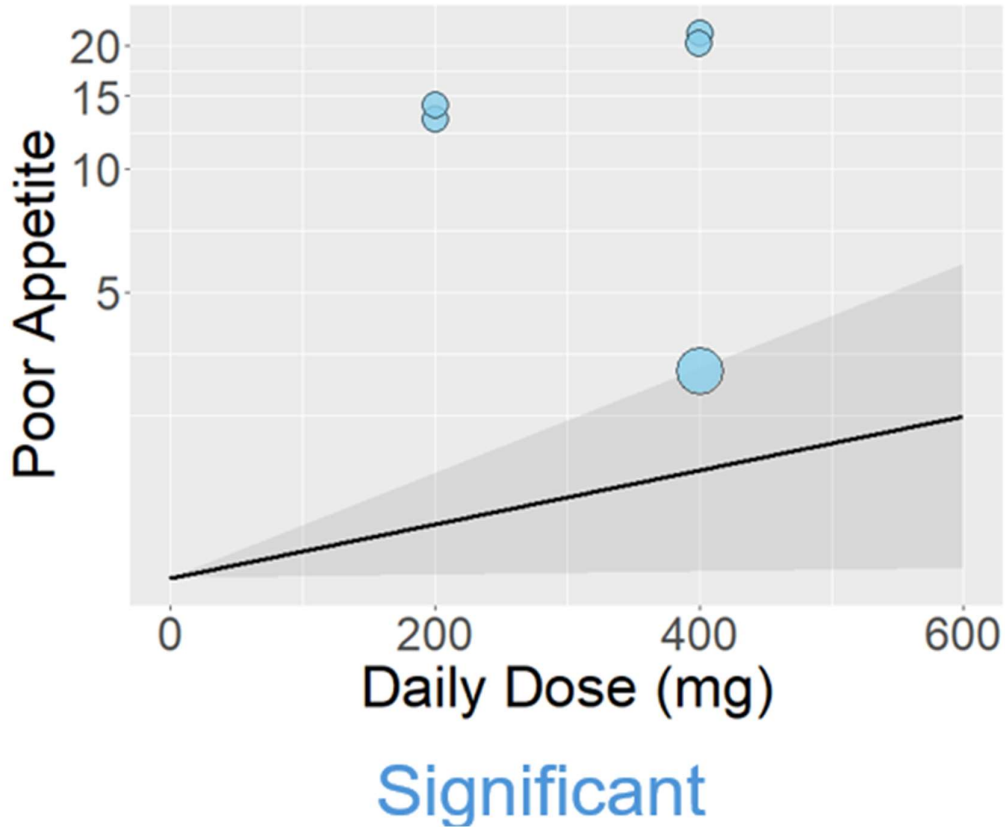



**eFigure 16.** Dose Response Meta-Analysis for Risk Ratio of Nausea

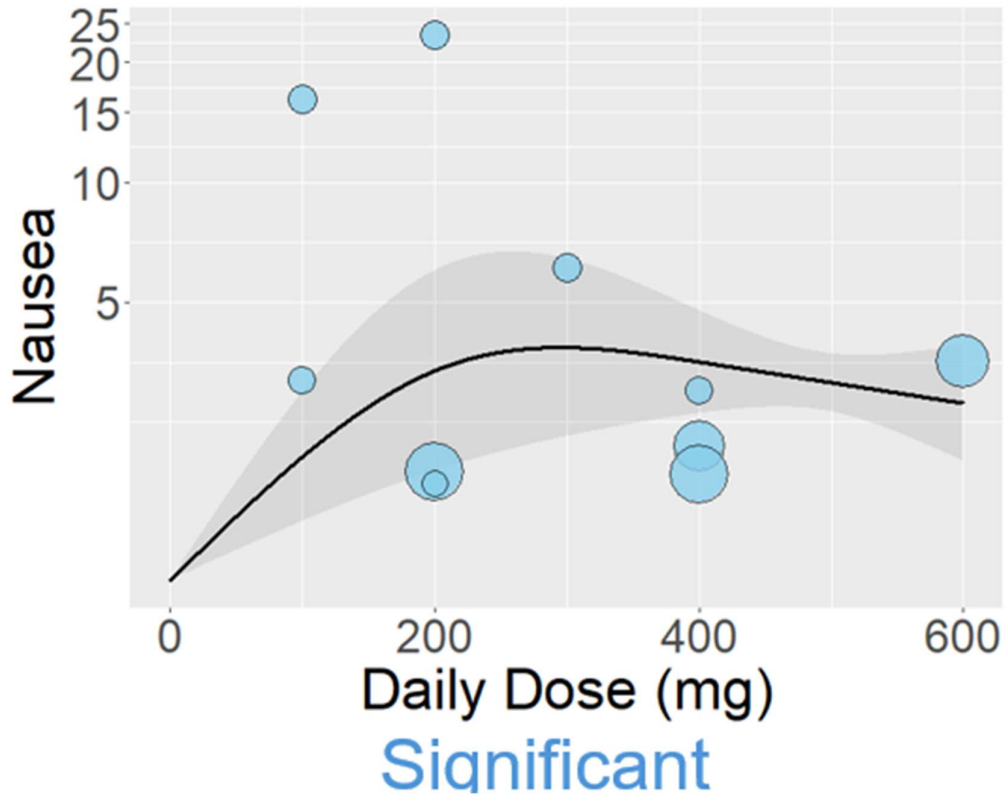

eFigure 17. Dose Response Meta-Analysis for Risk Ratio of Somnolence

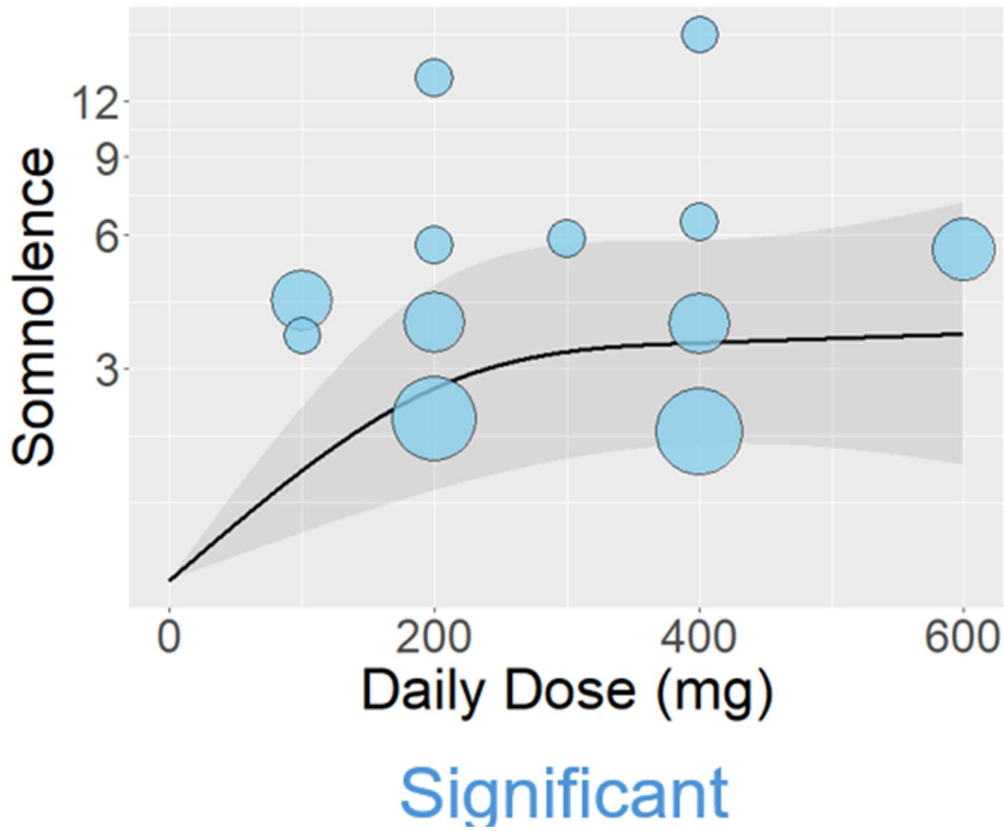

Supplement: jamanetwopen-e2445885-s001.pdf [file jamanetwopen-e2445885-s001.pdf]
