# Supplementary material for: Response Trajectories and Temporal Trends of Viloxazine Treatment for Young People With ADHD: A Meta-Analysis
Source: PubMed Central journal article supplement (PMC11577144; doi:10.1001/jamanetworkopen.2024.45885), 2024-11-19
Supplement: jamanetwopen-e2445885-s002.pdf [file jamanetwopen-e2445885-s002.pdf]

## Data Sharing Statement

Yu. Response Trajectories and Temporal Trends of Viloxazine Treatment for Young People With ADHD. *JAMA Netw Open*. Published November 19, 2024.

doi:10.1001/jamanetworkopen.2024.45885

### Data

**Data available:** No

### Additional Information

**Explanation for why data not available:** This is a meta-analytic study. The data were extract from other clinical trials
